# Supplementary material for: Prevalence of hepatitis B in people living with HIV/AIDS in Latin America and the Caribbean: a systematic review and meta-analysis
Source: PubMed Central journal article supplement (PMC5571507; doi:10.1186/s12879-017-2695-z), 2017-08-24
Supplement: 12879_2017_2695_MOESM2_ESM.pdf [file 12879_2017_2695_MOESM2_ESM.pdf]

## Additional file 2. Instrument for assessment of the quality of the studies

Title: .....

Authors: .....

Yes: .....

### Answer yes (Y) or no (N):

1. Is the study design adequate for its aims?..... |\_\_|
2. Were the data prospectively collected? ..... |\_\_|
3. Was the target population clearly defined?..... |\_\_|
4. Was probabilistic sampling used to identify potential participants? ..... |\_\_|
5. Was the sample size calculated? ..... |\_\_|
6. Were the inclusion and exclusion criteria well defined? ..... |\_\_|
7. Was the study period specified? ..... |\_\_|
8. Was the age range specified? ..... |\_\_|
9. Was the selection of participants adequate? (Did the authors comply with the preset criteria?) ..... |\_\_|
10. Is the proportion of non-participants adequate? Less than 30%? ..... |\_\_|
11. Is the sample of participants representative of the target population? ..... |\_\_|
12. Was the data collection standardized? ..... |\_\_|
13. Was the outcome clearly defined?..... |\_\_|
14. Is the outcome measure adequately described? (detection method?)..... |\_\_|
15. Is the method used for outcome diagnosis valid?..... |\_\_|
16. Was the data analysis described in a complete manner? ..... |\_\_|
17. Was the total number of participants clearly reported? ..... |\_\_|
18. Was the number of individuals who experienced the outcome clearly reported? ..... |\_\_|
19. Were the prevalence rates also described by age and sex? ..... |\_\_|
20. Did the authors report the 95% CI of the prevalence rates? ..... |\_\_|
21. Are the reported CI satisfactory? ..... |\_\_|

Total score |\_\_|
