# Supplementary material for: Prevalence of hepatitis B in people living with HIV/AIDS in Latin America and the Caribbean: a systematic review and meta-analysis
Source: PubMed Central journal article supplement (PMC5571507; doi:10.1186/s12879-017-2695-z), 2017-08-24
Supplement: 12879_2017_2695_MOESM3_ESM.pdf [file 12879_2017_2695_MOESM3_ESM.pdf]

### Additional file 3. Assessment of the quality of the studies

| AUTHOR                | SAMPLE | COLLECTION | PRESENTATION | TOTAL SCORE |
|-----------------------|--------|------------|--------------|-------------|
| MARTINS S             | 7      | 4          | 3            | 14          |
| BAUTISTA-AMOROCHO H   | 5      | 3          | 5            | 13          |
| JASPE RC              | 3      | 4          | 5            | 12          |
| FREITAS SZ            | 4      | 4          | 5            | 13          |
| OLIVEIRA EH           | 2      | 4          | 5            | 11          |
| OTTO-KNAPP R          | 7      | 2          | 3            | 12          |
| TORNATORE M           | 6      | 2          | 2            | 10          |
| BENZAKEN A            | 6      | 4          | 6            | 16          |
| LAUFER N              | 5      | 2          | 4            | 11          |
| PEREZ CC              | 4      | 3          | 1            | 8           |
| BELLO CORREDOR M      | 3      | 3          | 2            | 8           |
| ZAGO AM               | 5      | 4          | 4            | 13          |
| QUARLERI J            | 5      | 4          | 2            | 11          |
| BRAGA WS              | 6      | 4          | 2            | 12          |
| TOVO CV               | 4      | 4          | 2            | 10          |
| GRINSZTEJN B          | 4      | 2          | 3            | 9           |
| DE ALMEIDA PEREIRA RA | 6      | 4          | 3            | 13          |
| MONTEIRO MR           | 7      | 4          | 5            | 16          |
| SOUZA MG              | 5      | 4          | 4            | 13          |
| PAVAN MH              | 3      | 4          | 3            | 10          |
| SMIKLE MF             | 3      | 4          | 3            | 10          |
| FAINBOIM H            | 4      | 4          | 2            | 10          |
| MENDES-CORREA MC      | 4      | 4          | 2            | 10          |
| RODRIGUEZ L           | 3      | 4          | 3            | 10          |
| SOARES-SAMPAIO A      | 6      | 4          | 3            | 13          |
| BRANDAO NA            | 5      | 4          | 5            | 14          |

|             |   |   |   |    |
|-------------|---|---|---|----|
| VIEIRA AC   | 5 | 4 | 2 | 11 |
| OLIVEIRA MP | 7 | 4 | 5 | 16 |
