# Supplementary material for: Prevalence of hepatitis B in people living with HIV/AIDS in Latin America and the Caribbean: a systematic review and meta-analysis
Source: PubMed Central journal article supplement (PMC5571507; doi:10.1186/s12879-017-2695-z), 2017-08-24

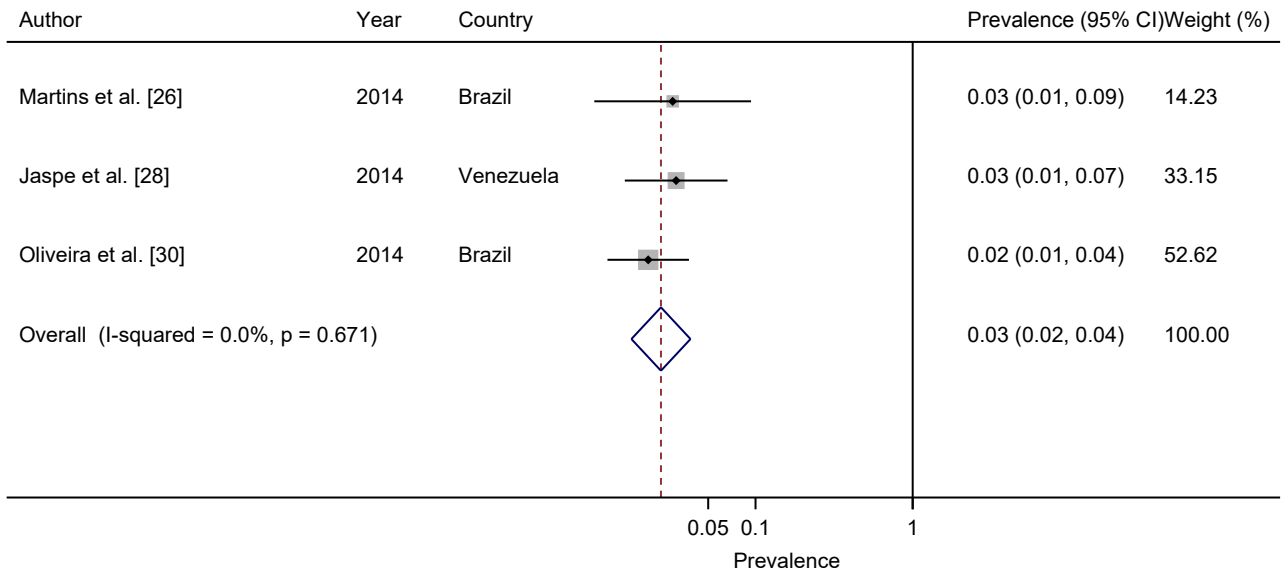

Supplement: 12879_2017_2695_MOESM7_ESM.pdf [file 12879_2017_2695_MOESM7_ESM.pdf]
